# Supplementary material
Source: HighWire-hosted journal article supplement (https://tobaccocontrol.bmj.com/highwire/filestream/165709/field_highwire_adjunct_files/0/tc-2022-057722supp001_data_supplement.pdf)
Supplement: tc-2022-057722supp001_data_supplement.pdf [file tc-2022-057722supp001_data_supplement.pdf]

## SUPPLEMENTAL MATERIAL

Supplemental Table 1 Smoking related disease according to ICD 10.

| No | Smoking related disease                      | ICD 10                                                   |
|----|----------------------------------------------|----------------------------------------------------------|
| 1  | Lung cancer                                  | C33, C34                                                 |
| 2  | Other cancers                                | C00-C16, C25, C32, C53, C64-C65, C67, C18, C20, C22, C92 |
| 3  | Coronary heart disease                       | I20-I25                                                  |
| 4  | Other heart disease                          | I00-I09, I26-I51                                         |
| 5  | Cerebrovascular disease                      | I60-I69                                                  |
| 6  | Other vascular disease                       | I70-I78                                                  |
| 7  | Diabetes mellitus                            | E10-E14                                                  |
| 8  | Influenza, pneumonia, tuberculosis           | J10-J11, J12-J18, A15-A19                                |
| 9  | Chronic obstructive pulmonary disease (COPD) | J40-J44                                                  |

Supplemental Table 2 USA and Belarus RRs for all causes, by smoking status

|                   | RR current smokers |       |       |      | RR former smokers |       |       |       |
|-------------------|--------------------|-------|-------|------|-------------------|-------|-------|-------|
|                   | 35-54              | 55-64 | 65-74 | 75+  | 35-54             | 55-64 | 65-74 | 75+   |
| <b>Male</b>       |                    |       |       |      |                   |       |       |       |
| <b>Belarus RR</b> | 1.82               |       |       |      | 1.00*             |       |       | 1.07* |
| <b>US RR</b>      | 2.55               | 2.97  | 3.02  | 2.4  | 1.33              | 1.47  | 1.57  | 1.41  |
| <b>Female</b>     |                    |       |       |      |                   |       |       |       |
| <b>Belarus RR</b> | 1.64               |       |       |      | 1.12*             | 1.00* |       |       |
| <b>US RR</b>      | 1.79               | 2.63  | 2.87  | 2.47 | 1.22              | 1.34  | 1.53  | 1.43  |

Sources: <sup>10</sup>, p. 24 and U.S. Department of Health and Human Services (2014)

Notes: \*Approximated: Belarus RR former=Belarus RR current\*(US RR former/US RR current)

Supplemental Table 3 Economic cost in BiH for all diseases, by age and gender (millions of EUR)

|                           | Belarus RR |       |       |       |      | US RR |       |       |       |      |
|---------------------------|------------|-------|-------|-------|------|-------|-------|-------|-------|------|
|                           | 35+        | 35-54 | 55-64 | 65-74 | 75+  | 35+   | 35-54 | 55-64 | 65-74 | 75+  |
| <b>Direct</b>             |            |       |       |       |      |       |       |       |       |      |
| <b>Male</b>               | 172.5      | 55.6  | 48.3  | 56.7  | 11.9 | 290.9 | 82.9  | 85.8  | 100.3 | 21.8 |
| <b>Female</b>             | 112.5      | 47.0  | 28.8  | 27.3  | 9.3  | 208.6 | 56.0  | 60.9  | 68.2  | 23.5 |
| <b>Total direct</b>       | 284.9      | 102.6 | 77.2  | 84.0  | 21.2 | 499.4 | 138.9 | 146.7 | 168.5 | 45.3 |
| <b>Indirect morbidity</b> |            |       |       |       |      |       |       |       |       |      |
| <b>Male</b>               | 17.3       | 10.9  | 6.1   | 0.3   | 0.0  | 27.6  | 16.3  | 10.7  | 0.5   | 0.0  |
| <b>Female</b>             | 8.5        | 6.1   | 2.3   | 0.2   | 0.0  | 12.5  | 7.3   | 4.9   | 0.3   | 0.0  |
| <b>Total morbidity</b>    | 25.9       | 17.1  | 8.4   | 0.4   | 0.0  | 40.1  | 23.6  | 15.6  | 0.8   | 0.0  |
| <b>Indirect mortality</b> |            |       |       |       |      |       |       |       |       |      |
| <b>Male</b>               | 46.1       | 30.2  | 12.9  | 2.9   | 0.2  | 79.7  | 48.6  | 25.2  | 5.7   | 0.3  |
| <b>Female</b>             | 10.6       | 7.0   | 2.8   | 0.7   | 0.1  | 16.0  | 8.3   | 5.8   | 1.7   | 0.2  |
| <b>Total mortality</b>    | 56.7       | 37.2  | 15.6  | 3.6   | 0.2  | 95.7  | 56.9  | 31.0  | 7.4   | 0.4  |
| <b>Total cost</b>         |            |       |       |       |      |       |       |       |       |      |

|               |              |              |              |             |             |              |              |              |              |             |
|---------------|--------------|--------------|--------------|-------------|-------------|--------------|--------------|--------------|--------------|-------------|
| <b>Male</b>   | <b>235.9</b> | 96.7         | 67.3         | 59.9        | 12.1        | <b>398.2</b> | 147.8        | 121.8        | 106.5        | 22.0        |
| <b>Female</b> | <b>131.6</b> | 60.1         | 33.9         | 28.2        | 9.4         | <b>237.0</b> | 71.5         | 71.5         | 70.2         | 23.7        |
| <b>Total</b>  | <b>367.5</b> | <b>156.8</b> | <b>101.2</b> | <b>88.0</b> | <b>21.4</b> | <b>635.1</b> | <b>219.4</b> | <b>193.3</b> | <b>176.7</b> | <b>45.8</b> |

Sources: Authors' calculations

Supplemental Table 4 Economic cost in BiH for selected tobacco-related diseases, by age and gender (millions of EUR)

|                                    | Total        |       |       |       |     | Direct medical |       |       |       |      | Indirect morbidity |       |       |       |     | Indirect mortality |       |       |       |     |     |
|------------------------------------|--------------|-------|-------|-------|-----|----------------|-------|-------|-------|------|--------------------|-------|-------|-------|-----|--------------------|-------|-------|-------|-----|-----|
|                                    | 35+          | 35-54 | 55-64 | 65-74 | 75+ | 35+            | 35-54 | 55-64 | 65-74 | 75+  | 35+                | 35-54 | 55-64 | 65-74 | 75+ | 35+                | 35-54 | 55-64 | 65-74 | 75+ |     |
| <b>Males</b>                       |              |       |       |       |     |                |       |       |       |      |                    |       |       |       |     |                    |       |       |       |     |     |
| Lung cancer                        | 20.3         | 6.3   | 9.6   | 3.9   | 0.5 | 5.3            | 0.5   | 2.1   | 0.0   | 2.4  | 0.4                | 0.6   | 0.2   | 0.4   | 0.0 | 0.0                | 14.4  | 5.6   | 7.2   | 1.5 | 0.1 |
| Other cancers                      | 13.0         | 4.3   | 4.4   | 3.7   | 0.6 | 6.8            | 1.1   | 2.0   | 0.0   | 3.1  | 0.5                | 1.0   | 0.4   | 0.5   | 0.1 | 0.0                | 5.2   | 2.8   | 1.8   | 0.6 | 0.1 |
| Coronary heart disease             | 22.2         | 11.8  | 6.9   | 3.1   | 0.4 | 7.0            | 1.6   | 2.5   | 0.0   | 2.4  | 0.4                | 1.3   | 0.8   | 0.5   | 0.0 | 0.0                | 13.9  | 9.3   | 3.9   | 0.7 | 0.0 |
| Other heart disease                | 13.5         | 5.6   | 4.4   | 2.9   | 0.5 | 5.7            | 1.1   | 1.7   | 0.0   | 2.4  | 0.5                | 0.8   | 0.4   | 0.4   | 0.0 | 0.0                | 7.0   | 4.2   | 2.3   | 0.5 | 0.1 |
| Cerebrovascular disease            | 7.0          | 3.0   | 2.6   | 1.3   | 0.2 | 2.0            | 0.3   | 0.6   | 0.0   | 0.9  | 0.2                | 0.6   | 0.3   | 0.4   | 0.0 | 0.0                | 4.4   | 2.5   | 1.6   | 0.4 | 0.0 |
| Other vascular disease             | 4.4          | 0.9   | 1.2   | 1.8   | 0.5 | 3.2            | 0.3   | 0.8   | 0.0   | 1.7  | 0.5                | 0.3   | 0.1   | 0.2   | 0.0 | 0.0                | 0.9   | 0.6   | 0.3   | 0.2 | 0.0 |
| Diabetes mellitus                  | 8.2          | 2.7   | 3.9   | 1.6   | 0.0 | 6.2            | 1.7   | 3.0   | 0.0   | 1.5  | 0.0                | 0.4   | 0.2   | 0.2   | 0.0 | 0.0                | 1.6   | 0.7   | 0.8   | 0.2 | 0.0 |
| Influenza, pneumonia, tuberculosis | 5.6          | 2.9   | 1.9   | 0.6   | 0.2 | 2.2            | 0.8   | 0.8   | 0.0   | 0.5  | 0.1                | 0.5   | 0.3   | 0.3   | 0.0 | 0.0                | 2.8   | 1.8   | 0.8   | 0.1 | 0.0 |
| COPD                               | 7.9          | 0.7   | 2.2   | 3.0   | 2.0 | 6.4            | 0.4   | 1.4   | 0.0   | 2.7  | 1.9                | 0.3   | 0.1   | 0.2   | 0.1 | 0.0                | 1.2   | 0.3   | 0.7   | 0.3 | 0.1 |
| <b>Total male</b>                  | <b>102.0</b> | 38.2  | 37.2  | 22.0  | 4.7 | 44.7           | 7.8   | 14.9  | 0.0   | 17.6 | 4.4                | 5.8   | 2.7   | 3.0   | 0.2 | 0.0                | 51.5  | 27.8  | 19.3  | 4.2 | 0.2 |
| <b>Females</b>                     |              |       |       |       |     |                |       |       |       |      |                    |       |       |       |     |                    |       |       |       |     |     |
| Lung cancer                        | 5.3          | 1.9   | 2.2   | 1.0   | 0.1 | 1.9            | 0.4   | 0.8   | 0.0   | 0.7  | 0.1                | 0.3   | 0.1   | 0.2   | 0.0 | 0.0                | 3.1   | 1.4   | 1.3   | 0.3 | 0.0 |
| Other cancers                      | 4.4          | 1.2   | 2.0   | 0.9   | 0.2 | 2.7            | 0.5   | 1.2   | 0.0   | 0.8  | 0.2                | 0.4   | 0.2   | 0.2   | 0.0 | 0.0                | 1.3   | 0.6   | 0.6   | 0.1 | 0.0 |
| Coronary heart disease             | 5.5          | 2.0   | 1.5   | 1.5   | 0.4 | 3.0            | 0.5   | 0.8   | 0.0   | 1.3  | 0.4                | 0.2   | 0.1   | 0.1   | 0.0 | 0.0                | 2.3   | 1.4   | 0.6   | 0.2 | 0.0 |
| Other heart disease                | 4.6          | 1.7   | 1.0   | 1.2   | 0.7 | 2.9            | 0.6   | 0.6   | 0.0   | 1.0  | 0.7                | 0.2   | 0.1   | 0.1   | 0.0 | 0.0                | 1.5   | 1.0   | 0.4   | 0.1 | 0.0 |
| Cerebrovascular disease            | 2.6          | 1.2   | 0.6   | 0.6   | 0.3 | 1.2            | 0.3   | 0.2   | 0.0   | 0.5  | 0.3                | 0.2   | 0.1   | 0.1   | 0.1 | 0.0                | 1.2   | 0.8   | 0.3   | 0.2 | 0.0 |
| Other vascular disease             | 1.4          | 0.2   | 0.2   | 0.6   | 0.3 | 1.1            | 0.1   | 0.2   | 0.0   | 0.6  | 0.3                | 0.1   | 0.0   | 0.0   | 0.0 | 0.0                | 0.2   | 0.1   | 0.1   | 0.1 | 0.0 |
| Diabetes mellitus                  | 7.3          | 1.1   | 1.5   | 1.0   | 3.7 | 6.9            | 0.9   | 1.3   | 0.0   | 1.0  | 3.7                | 0.1   | 0.1   | 0.1   | 0.0 | 0.0                | 0.4   | 0.2   | 0.2   | 0.1 | 0.0 |
| Influenza, pneumonia, tuberculosis | 2.3          | 1.1   | 0.8   | 0.2   | 0.1 | 1.5            | 0.6   | 0.6   | 0.0   | 0.2  | 0.1                | 0.2   | 0.2   | 0.1   | 0.0 | 0.0                | 0.6   | 0.4   | 0.2   | 0.0 | 0.0 |
| COPD                               | 4.6          | 0.5   | 1.1   | 1.6   | 1.3 | 4.1            | 0.4   | 0.9   | 0.0   | 1.6  | 1.3                | 0.1   | 0.0   | 0.1   | 0.0 | 0.0                | 0.4   | 0.1   | 0.2   | 0.1 | 0.0 |
| <b>Total female</b>                | <b>37.8</b>  | 11.0  | 11.0  | 8.6   | 7.1 | 25.2           | 4.1   | 6.4   | 0.0   | 7.5  | 7.1                | 1.6   | 0.8   | 0.8   | 0.1 | 0.0                | 10.9  | 6.1   | 3.7   | 1.1 | 0.1 |

|              |              |      |      |      |      |      |      |      |     |      |      |     |     |     |     |     |      |      |      |     |     |
|--------------|--------------|------|------|------|------|------|------|------|-----|------|------|-----|-----|-----|-----|-----|------|------|------|-----|-----|
| <b>TOTAL</b> | <b>139.8</b> | 49.2 | 48.2 | 30.6 | 11.8 | 69.9 | 11.9 | 21.4 | 0.0 | 25.1 | 11.5 | 7.5 | 3.5 | 3.8 | 0.3 | 0.0 | 62.4 | 33.8 | 23.0 | 5.3 | 0.3 |
|--------------|--------------|------|------|------|------|------|------|------|-----|------|------|-----|-----|-----|-----|-----|------|------|------|-----|-----|

Source: Authors' calculation
